# Supplementary material for: Self-assembly of bowl-like trinuclear metallo-macrocycles
Source: Royal Society of Chemistry journal article supplement (doi:10.1039/b926138a), 2010-01-01
Supplement: b926138a.pdf [file b926138a.pdf]

## Supporting Information

# Self-Assembly of Bowl-Like Trinuclear Metallo-macrocycles

*Guo-Hong Ning,<sup>a</sup> Ting-Zheng Xie,<sup>a</sup> Yuan-Jiang Pan,<sup>b</sup> Yi-Zhi Li,<sup>c</sup> Shu-Yan Yu,<sup>\* a</sup>.*

Laboratory for Self-Assembly Chemistry , Department of Chemistry, Renmin University of China, Beijing 100872, China

\* To whom correspondence should be addressed. E-mail: yusy@ruc.edu.cn. Fax: +86-10-62516614

### Contents:

Tables of selected bond lengths and bond angles for the complexes **4a**, **11**, **13** and **14a**

Tables of hydrogen bond lengths (Å) and angles (°) for the complex **4a**, **11**, **13** and **14a**

Packing diagrams of the complexes **4a**, **11**, **13** and **14a**

**S1-S4**

**Table S1** Selected Bond Lengths (Å) and Angles (°) for **4a**

---

|           |          |             |          |
|-----------|----------|-------------|----------|
| Pd1-N1    | 2.013(4) | Pd1-N2      | 2.011(4) |
| Pd1-N7    | 2.007(3) | Pd1-N8      | 1.995(4) |
| Pd2-N3    | 2.040(3) | Pd2-N4      | 2.030(3) |
| Pd2-N9    | 2.013(3) | Pd2-N10     | 2.017(3) |
| Pd3-N5    | 2.047(3) | Pd3-N6      | 2.021(4) |
| Pd3-N11   | 2.038(4) | Pd3-N12     | 2.032(4) |
| <hr/>     |          |             |          |
| N1-Pd1-N2 | 82.2(2)  | N7-Pd1-N8   | 87.2(1)  |
| N3-Pd2-N4 | 82.1(1)  | N9-Pd2-N10  | 88.5(1)  |
| N5-Pd3-N6 | 81.3(1)  | N11-Pd3-N12 | 87.8(2)  |

---

**Table S2** Hydrogen bond lengths (Å) and angles (°) for the complex **4a**

| D-H...A                     | D(D-H) | D(H...A) | D(D...A) | ∠(DHA) |
|-----------------------------|--------|----------|----------|--------|
| C1-H1...N13                 | 0.93   | 2.43     | 3.169(5) | 136    |
| C8-H8...F12 <sup>a</sup>    | 0.93   | 2.40     | 3.277(4) | 157    |
| C103-H10H...F6              | 0.96   | 2.44     | 3.186(5) | 135    |
| C15-H15...F3 <sup>b</sup>   | 0.93   | 2.43     | 3.189(4) | 139    |
| C26-H26...F1                | 0.93   | 2.41     | 3.081(5) | 129    |
| C47-H47...O10 <sup>b</sup>  | 0.93   | 2.57     | 3.273(5) | 133    |
| C58-H58...O7 <sup>b</sup>   | 0.93   | 2.45     | 3.249(5) | 145    |
| C69-H69...O8 <sup>b</sup>   | 0.93   | 2.17     | 3.044(5) | 156    |
| C74-H74B...O2               | 0.93   | 2.20     | 2.558(5) | 100    |
| C79-H79A...O13 <sup>c</sup> | 0.93   | 2.47     | 3.142(5) | 126    |
| C80-H80B...O12 <sup>c</sup> | 0.93   | 2.42     | 3.317(5) | 155    |
| C83-H83A...F14 <sup>b</sup> | 0.93   | 2.54     | 3.483(5) | 165    |
| C89-H89A...F4 <sup>d</sup>  | 0.93   | 2.41     | 3.226(5) | 142    |
| C95-H95C...N7               | 0.93   | 2.27     | 3.198(5) | 163    |
| C99-H99B...F6               | 0.93   | 2.46     | 3.209(5) | 134    |

Symmetry codes: <sup>a</sup> x,-1+y,z; <sup>b</sup> 2-x,-y,1-z; <sup>c</sup> 1+x,-1+y,z; <sup>d</sup> 1-x,1-y,1-z.

**Table S3** Selected Bond Lengths (Å) and Angles (°) for **11**

---

|           |          |             |          |
|-----------|----------|-------------|----------|
| Pd1-N1    | 2.033(5) | Pd1-N2      | 2.040(4) |
| Pd1-N7    | 2.006(5) | Pd1-N12     | 2.001(4) |
| Pd2-N3    | 2.020(4) | Pd2-N4      | 2.015(4) |
| Pd2-N8    | 2.028(4) | Pd2-N9      | 1.988(4) |
| Pd3-N5    | 2.016(4) | Pd3-N6      | 2.013(5) |
| Pd3-N10   | 2.003(4) | Pd3-N11     | 2.003(4) |
|           |          |             |          |
| N1-Pd1-N2 | 81.4(2)  | N7-Pd1-N12  | 89.5(2)  |
| N3-Pd2-N4 | 81.8(2)  | N8-Pd2-N9   | 90.4(2)  |
| N5-Pd3-N6 | 82.6(2)  | N10-Pd3-N11 | 88.6(2)  |

---

**Table S4** Hydrogen bond lengths (Å) and angles (°) for the complex **11**

| D-H...A                    | D(D-H) | D(H...A) | D(D...A) | ∠(DHA) |
|----------------------------|--------|----------|----------|--------|
| C1-H1...O19 <sup>a</sup>   | 0.93   | 2.47     | 3.245(6) | 140    |
| C2-H2...O21 <sup>a</sup>   | 0.93   | 2.41     | 3.205(8) | 144    |
| C9-H9...O17                | 0.93   | 2.38     | 3.171(7) | 143    |
| C10-H10...O16              | 0.93   | 2.36     | 3.194(7) | 149    |
| C13-H13...O16              | 0.93   | 2.49     | 3.341(6) | 153    |
| C21-H21...O22 <sup>a</sup> | 0.93   | 2.58     | 3.501(7) | 170    |
| C33-H33...O20 <sup>a</sup> | 0.93   | 2.48     | 3.382(7) | 162    |
| C34-H34...O19 <sup>a</sup> | 0.93   | 2.60     | 3.312(7) | 134    |
| C39-H39...O21 <sup>b</sup> | 0.93   | 2.55     | 3.428(7) | 157    |
| C43-H43...O16 <sup>a</sup> | 0.93   | 2.36     | 3.278(7) | 168    |
| C48-H48...O24 <sup>c</sup> | 0.93   | 2.48     | 3.330(7) | 152    |
| C52-H52...O23 <sup>c</sup> | 0.93   | 2.60     | 3.515(7) | 170    |
| C57-H57...O16 <sup>a</sup> | 0.93   | 2.40     | 3.317(7) | 169    |
| C64-H64B...O22             | 0.97   | 2.58     | 3.266(7) | 128    |
| C73-H73B...O7              | 0.97   | 2.44     | 3.381(8) | 165    |
| C74-H74A...O14             | 0.97   | 2.59     | 3.558(7) | 174    |
| C74-H74A...O15             | 0.97   | 2.26     | 2.770(7) | 112    |

Symmetry codes: <sup>a</sup> 1-x, 1-y, 1-z; <sup>b</sup> 2-x, 1-y, 1-z; <sup>c</sup> x, 1+y, z.

**Table S5** Selected Bond Lengths (Å) and Angles (°) for complex **13**

---

|           |          |             |          |
|-----------|----------|-------------|----------|
| Pd1-N1    | 2.005(6) | Pd1-N2      | 2.008(5) |
| Pd1-N7    | 1.992(5) | Pd1-N12     | 2.002(5) |
| Pd2-N3    | 2.027(5) | Pd2-N4      | 2.023(5) |
| Pd2-N8    | 2.008(5) | Pd2-N9      | 2.018(5) |
| Pd3-N5    | 2.019(5) | Pd3-N6      | 2.011(5) |
| Pd3-N10   | 2.004(5) | Pd3-N11     | 1.999(5) |
| <hr/>     |          |             |          |
| N1-Pd1-N2 | 81.8(2)  | N7-Pd1-N12  | 86.9(2)  |
| N3-Pd2-N4 | 81.8(2)  | N8-Pd2-N9   | 87.5(2)  |
| N5-Pd3-N6 | 80.3(2)  | N10-Pd3-N11 | 87.9(2)  |

---

**Table S6** Hydrogen bond lengths (Å) and angles (°) for the complex **13**

| D-H...A                   | D(D-H) | D(H...A) | D(D...A)  | ∠(DHA) |
|---------------------------|--------|----------|-----------|--------|
| O10-H10A...O3             | 0.82   | 2.21     | 2.709(8)  | 119    |
| O11-H11A...O6             | 0.85   | 2.30     | 2.738(9)  | 113    |
| C11-H11...N8              | 0.93   | 2.59     | 3.106(8)  | 116    |
| C11-H11...O2 <sup>a</sup> | 0.93   | 2.52     | 3.156(10) | 126    |
| C12-H12...O1 <sup>a</sup> | 0.93   | 2.56     | 3.318(10) | 139    |
| C17-H17...O9 <sup>b</sup> | 0.93   | 2.39     | 3.285(9)  | 160    |
| C20-H20...O5 <sup>c</sup> | 0.93   | 2.51     | 3.288(8)  | 141    |
| C21-H21...N10             | 0.93   | 2.60     | 3.116(8)  | 116    |
| C21-H21...O5 <sup>c</sup> | 0.93   | 2.54     | 3.273(8)  | 136    |
| C28-H28...O7 <sup>d</sup> | 0.93   | 2.55     | 3.304(7)  | 139    |
| C30-H30...N11             | 0.93   | 2.62     | 3.121(10) | 114    |
| C44-H44...O5 <sup>e</sup> | 0.93   | 2.43     | 3.357(11) | 173    |

Symmetry codes: <sup>a</sup> x,-y,1/2+z; <sup>b</sup> -x,1-y,1-z; <sup>c</sup> 1/2-x,-1/2+y,1/2-z; <sup>d</sup> 1/2-x,3/2-y,2-z; <sup>e</sup> x,1-y,1/2+z.

**Table S7** Selected Bond Lengths (Å) and Angles (°) for complex **14a**

|           |          |            |          |
|-----------|----------|------------|----------|
| Pd1-N1    | 2.007(4) | Pd1-N2     | 2.012(4) |
| Pd1-N3    | 2.011(4) | Pd1-N4     | 2.019(4) |
| Pd2-N5    | 2.002(4) | Pd2-N6     | 2.016(4) |
| N1-Pd1-N2 | 81.1(2)  | N5-Pd2-N5A | 86.4(2)  |
| N3-Pd1-N4 | 87.9(2)  | N6-Pd2-N6A | 80.6(2)  |

Symmetry codes: -x, y, z

**Table S8** Hydrogen bond lengths (Å) and angles (°) for the complex **14a**

| D-H...A                    | D(D-H) | D(H...A) | D(D...A) | ∠(DHA) |
|----------------------------|--------|----------|----------|--------|
| C1-H1...N4                 | 0.93   | 2.58     | 3.103(6) | 116    |
| C13-H13...F1 <sup>a</sup>  | 0.93   | 2.31     | 3.156(7) | 151    |
| C13-H13...F1 <sup>b</sup>  | 0.93   | 2.31     | 3.156(7) | 151    |
| C17-H17...F4 <sup>a</sup>  | 0.93   | 2.39     | 3.317(6) | 171    |
| C24-H24...N7               | 0.93   | 2.57     | 3.299(7) | 135    |
| C28-H28...F4 <sup>c</sup>  | 0.93   | 2.40     | 3.330(7) | 175    |
| C31-H31B...F8 <sup>d</sup> | 0.96   | 2.40     | 3.355(7) | 172    |

Symmetry codes: <sup>a</sup> x,y,-1+z; <sup>b</sup> -x,y,-1+z; <sup>c</sup> x,-y,1-z; <sup>d</sup> 1/2-x,-y,-1/2+z.



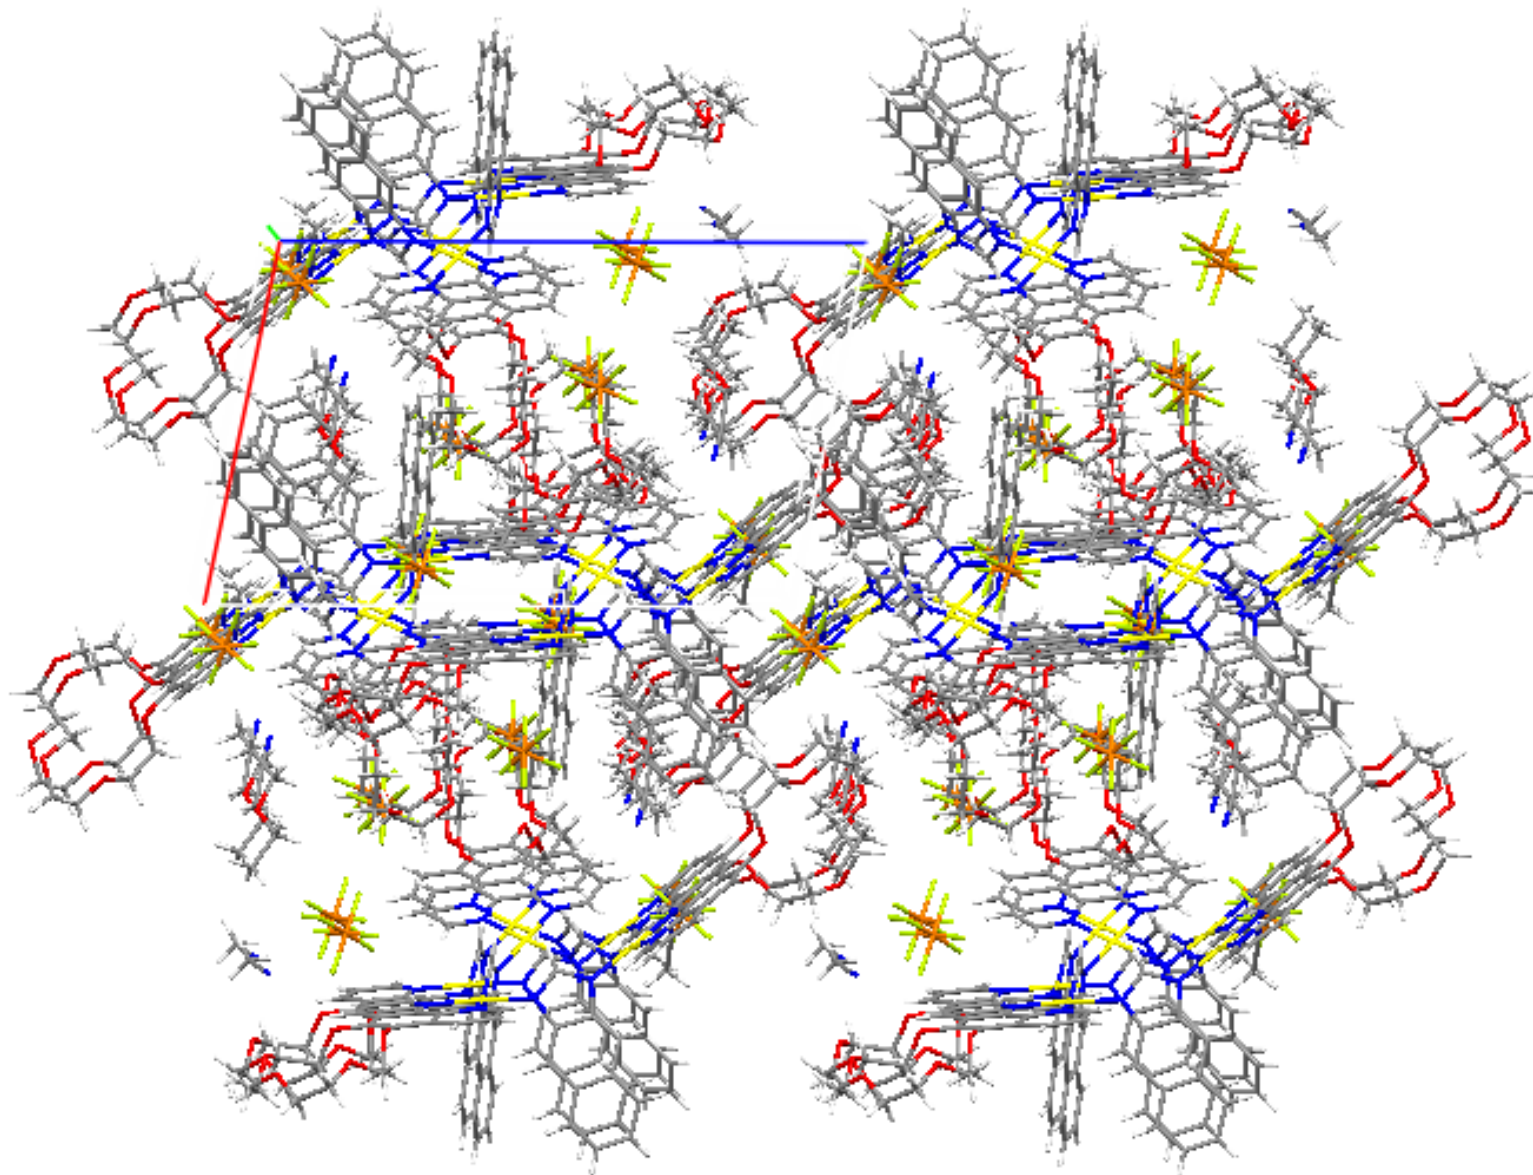

**Figure S1** Packing diagram with channel formed by the cavity of complex **4a** viewed along the b axis.

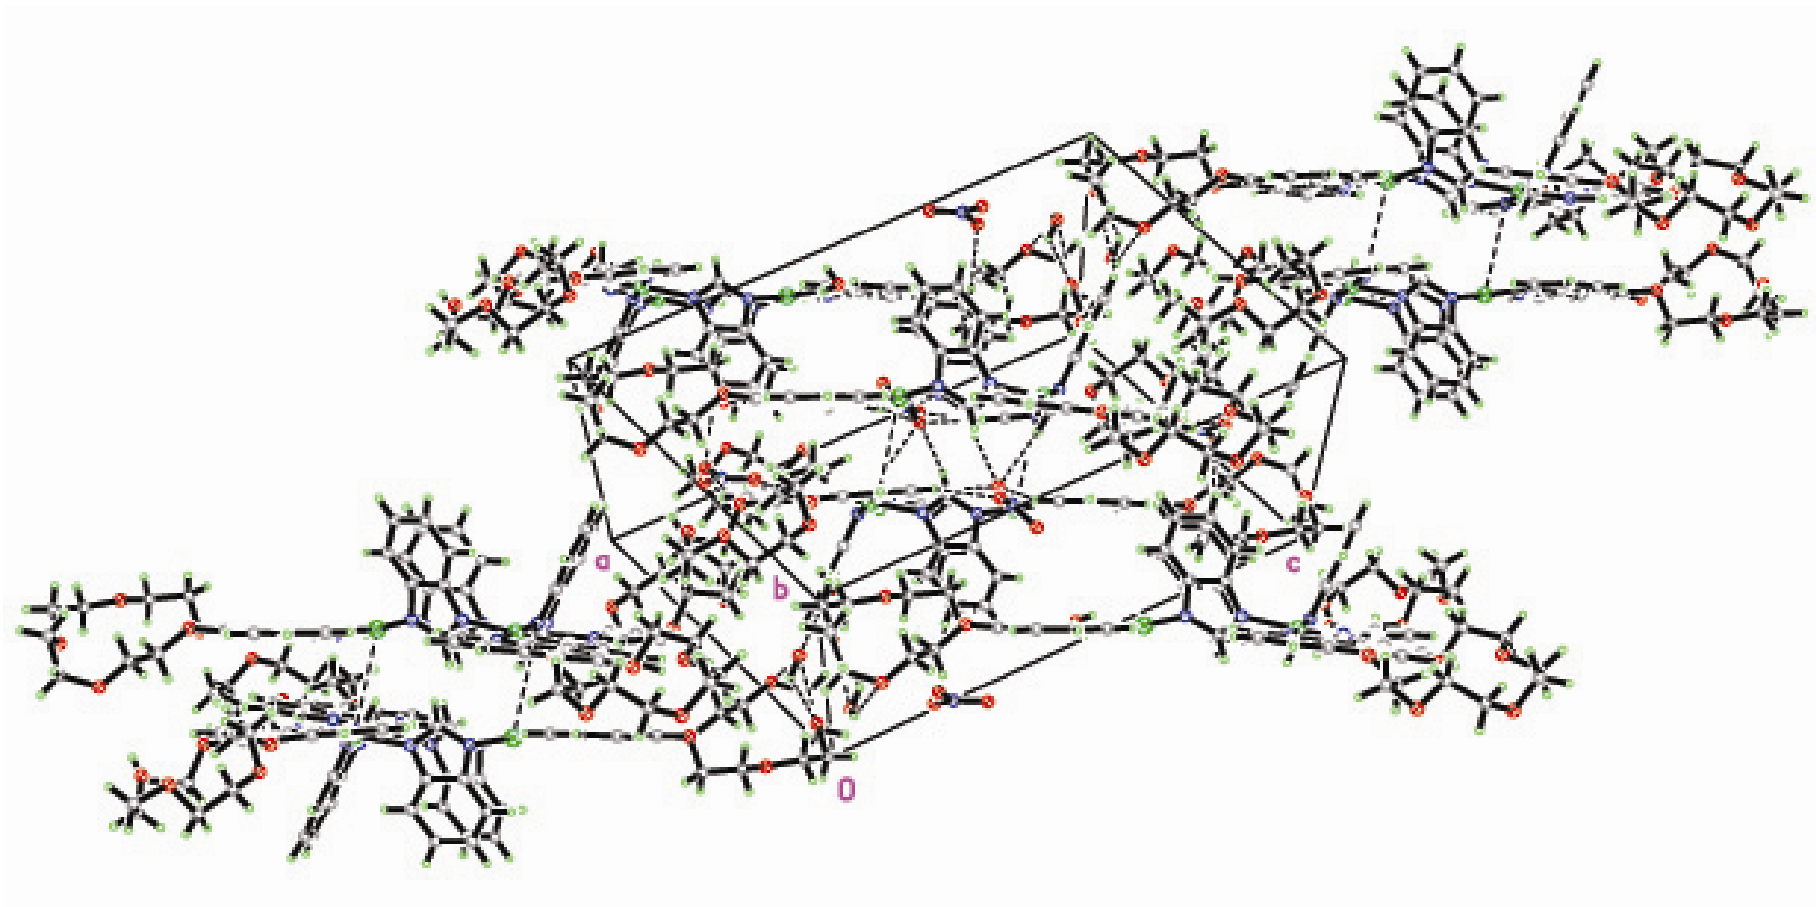

**Figure S2** Packing diagram with channel formed by the cavity of complex **11** viewed along the b axis.

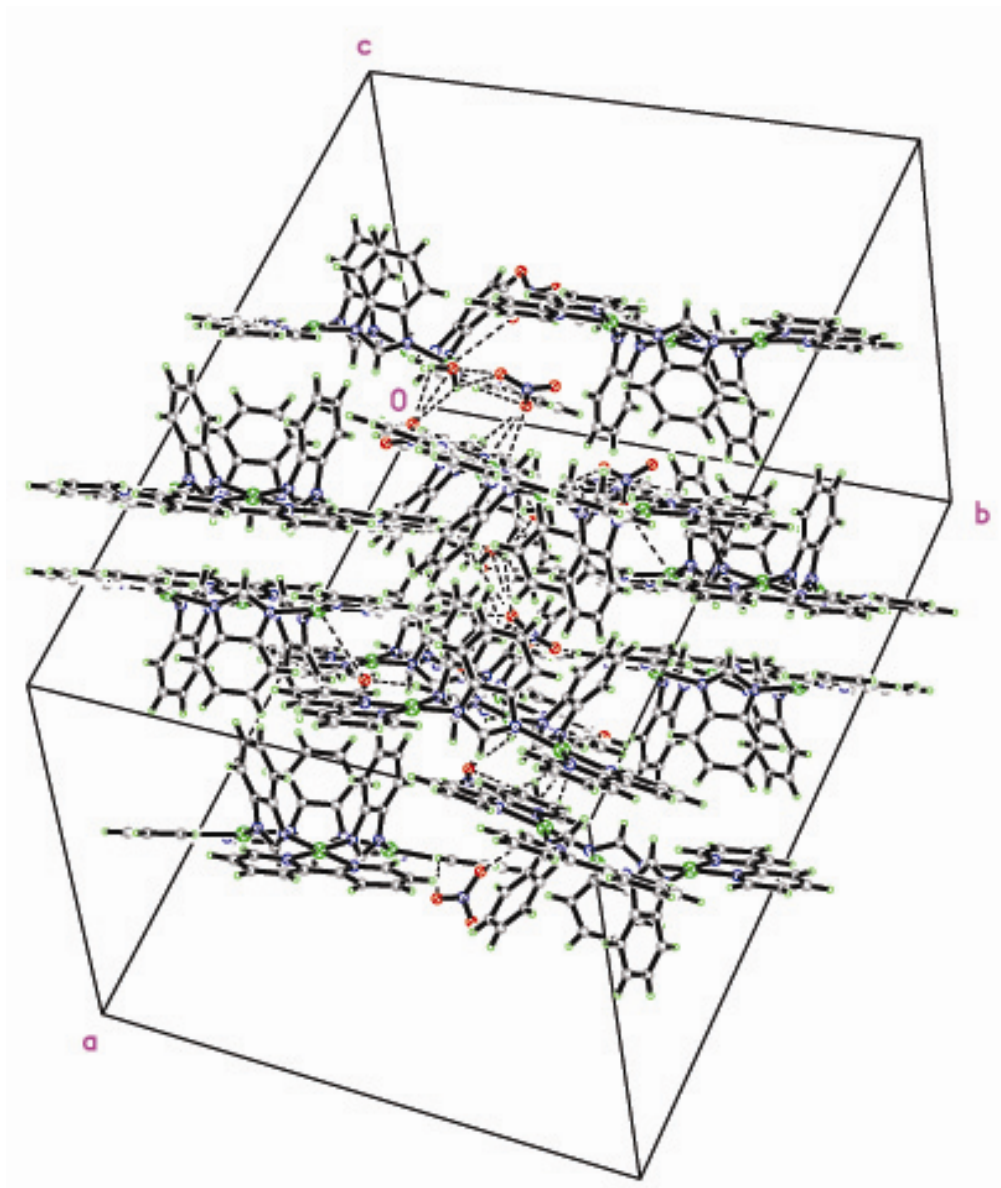

**Figure S3** Packing diagram with channel formed by the cavity of complex **13** viewed along the c axis.

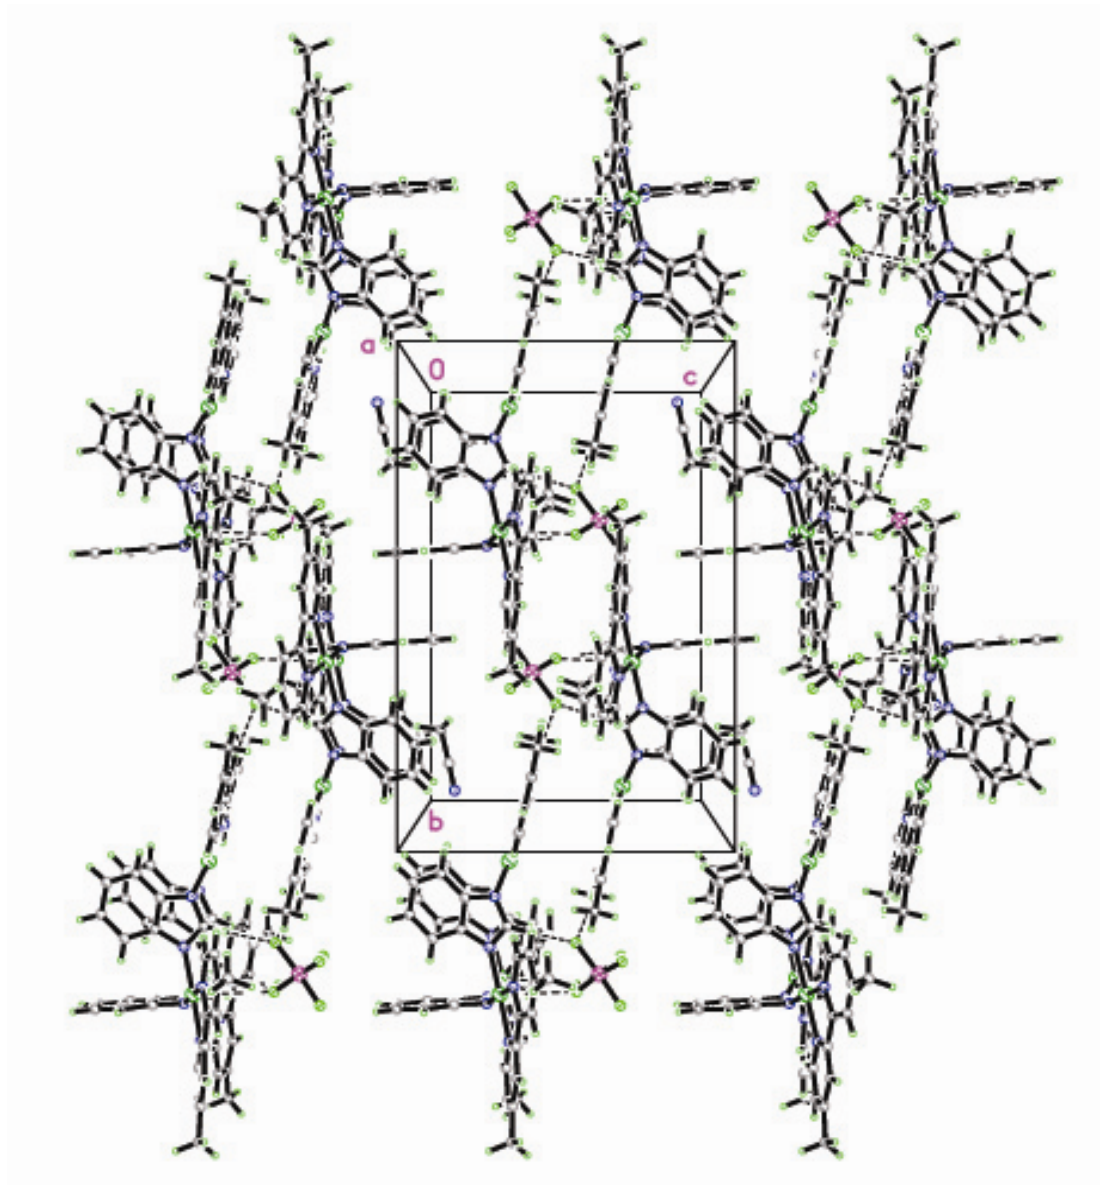

**Figure S4** Packing diagram with channel formed by the cavity of complex **14a** viewed along the *a* axis.
